# Supplementary material
Source: ML conference proceedings conference paper supplement (https://openreview.net/forum?id=sbapQyunYK)
Supplement: supplementary_material [file attachment]

## A APPENDIX/SUPPLEMENTAL MATERIAL

## A.1 USED SYMBOLS

Table 4: Explanation of the symbols used in the paper.

| Used Symbols                    | Descriptions                                     |
|---------------------------------|--------------------------------------------------|
| $G_0 = \{\mathcal{V}_0, E_0\}$  | Clean graph                                      |
| $\mathcal{V}_t: t = 1 \cdots T$ | One-hot encoded node- $i$ features               |
| $E_t: t = 1 \cdots T$           | One-hot encoded edge features                    |
| $q(G_t   G_{t-1})$              | Noise-driven forward diffusion process           |
| $p_\phi(G_{t-1}   G_t)$         | Reverse diffusion or denoising                   |
| $n$                             | Number of states                                 |
| $\mathcal{C}_i: i = 1 \cdots B$ | $i$ -th block containing nodes                   |
| $G_{\leq k}$                    | $\mathcal{C}_1 \cup \cdots \cup \mathcal{C}_k$ . |

## A.2 VARIATIONAL OBJECTIVE FOR STRUCTURED GRAPH DIFFUSION

To train the reverse denoising model  $p_\theta(G_{t-1} | G_t)$  to approximate the true posterior of the forward process  $q_\phi(G_{t-1} | G_t, G_0)$ , we derive a variational lower bound (VLB) on the marginal likelihood  $\log p_\theta(G_0)$ . Starting from the evidence lower bound:

$$\log p_\theta(G_0) = \log \int q_\phi(G_{1:T} | G_0) \cdot \frac{p_\theta(G_0, G_{1:T})}{q_\phi(G_{1:T} | G_0)} dG_{1:T} \geq \mathbb{E}_{q_\phi(G_{1:T} | G_0)} \left[ \log \frac{p_\theta(G_0, G_{1:T})}{q_\phi(G_{1:T} | G_0)} \right] \quad (3)$$

We decompose the joint distributions as:

$$\begin{aligned} p_\theta(G_0, G_{1:T}) &= p_\theta(G_T) \prod_{t=2}^T p_\theta(G_{t-1} | G_t), \\ q_\phi(G_{1:T} | G_0) &= \prod_{t=1}^T q_\phi(G_t | G_{t-1}, G_0) \end{aligned} \quad (4)$$

Substituting into the ELBO:

$$\log p_\theta(G_0) \geq \mathbb{E}_{q_\phi} \left[ \log p_\theta(G_T) + \sum_{t=2}^T \log p_\theta(G_{t-1} | G_t) - \sum_{t=1}^T \log q_\phi(G_t | G_{t-1}, G_0) \right] \quad (5)$$

This can be rearranged as:

$$\log p_\theta(G_0) \geq \mathbb{E}_{q_\phi} \left[ \log p_\theta(G_T) - \log q_\phi(G_1 | G_0) + \sum_{t=2}^T \log \frac{p_\theta(G_{t-1} | G_t)}{q_\phi(G_t | G_{t-1}, G_0)} \right] \quad (6)$$

We reorganize the objective into reconstruction and KL terms:

$$\begin{aligned} \log p_\theta(G_0) &\geq \mathbb{E}_{q_\phi} [\log p_\theta(G_0 | G_1)] - \sum_{t=2}^T \mathbb{E}_{q_\phi} [D_{\text{KL}}(q_\phi(G_{t-1} | G_t, G_0) \| p_\theta(G_{t-1} | G_t))] \\ &\quad - \text{const.} \end{aligned} \quad (7)$$

We define the total training objective as:

$$\mathcal{L}(\theta) = \mathcal{L}_{\text{rec}}(\theta) + \sum_{t=2}^T \mathcal{L}_t(\theta) \quad (8)$$

702 where:

$$703 \mathcal{L}_{\text{rec}}(\theta) = -\mathbb{E}_{q_\phi} [\log p_\theta(G_0 | G_1)] \quad (9)$$

$$704 \mathcal{L}_t(\theta) = \mathbb{E}_{q_\phi} [D_{\text{KL}}(q_\phi(G_{t-1} | G_t, G_0) \| p_\theta(G_{t-1} | G_t))] \quad (10)$$

705 This variational bound enables efficient training via a hybrid loss that balances data likelihood with  
706 forward–reverse consistency across diffusion steps.

### 707 A.3 PARAMETERIZING FORWARD AND REVERSE TRANSITIONS IN DISCRETE GRAPH 708 DIFFUSION

709 We define the forward and reverse diffusion processes over graphs using a simplified discrete-time  
710 formulation, following Zhao et al. Zhao et al. (2024). Our framework focuses on three key distribu-  
711 tions: (i) the forward marginal  $q(G_t | G_0)$ , (ii) the backward posterior  $q(G_{t-1} | G_t, G_0)$ , and (iii)  
712 the learned reverse process  $p_\phi(G_{t-1} | G_t)$ . This design prioritizes memory efficiency and avoids  
713 the complexity introduced by approximations such as those in D3PM Austin et al. (2021).

714 Since the forward process applies noise independently to all nodes and edges (as shown in Eq. (1)),  
715 we can model these three distributions by factorizing over individual elements. Let  $x \in \mathcal{V}_t \cup \mathcal{E}_t$  be a  
716 discrete random variable with one-hot encoding and categorical distribution:  $x \sim \text{Cat}(x; \mathbf{p})$ , where  
717  $\mathbf{p} \in [0, 1]^n$  and  $\mathbf{1}^\top \mathbf{p} = 1$ . Then the probability of observing a one-hot state  $x$  under distribution  $\mathbf{p}$   
718 is  $x^\top \mathbf{p}$ . The corruption step  $q(x_t | x_{t-1})$  can be expressed using a transition matrix  $Q_t \in [0, 1]^{n \times n}$   
719 as:

$$720 q(x_t | x_{t-1}) = \text{Cat}(x_t; Q_t^\top x_{t-1}) \quad (11)$$

721 Let the composed transition matrix be  $\overline{Q}_t = Q_1 Q_2 \cdots Q_t$ . Then, the forward marginal becomes:

$$722 q(x_t | x_0) = \text{Cat}(x_t; \overline{Q}_t^\top x_0) \quad (12)$$

723 The backward posterior is:

$$724 q(x_{t-1} | x_t, x_0) = \text{Cat}\left(x_{t-1}; \frac{Q_t x_t \odot \overline{Q}_{t-1}^\top x_0}{x_t^\top \overline{Q}_t^\top x_0}\right) \quad (13)$$

725 This applies to both node states  $x = v_i^t \in \mathcal{V}_t$  and edge types  $x = e_{i,j}^t \in \mathcal{E}_t$ , with the same  
726 formulation. We optionally use shared transition matrices  $Q_t^\mathcal{V}$  and  $Q_t^\mathcal{E}$  for all nodes and edges,  
727 respectively. See the next section for derivation. To define a uniform and information-less terminal  
728 distribution  $q(G_T | G_0)$ , we choose:

$$729 Q_t = \alpha_t I + (1 - \alpha_t) \mathbf{1m}^\top \quad (14)$$

730 where  $\alpha_t \in [0, 1]$  is a time-dependent noise schedule, and  $\mathbf{m} \in [0, 1]^n$  is the uniform categorical  
731 distribution over  $n$  states, such that  $m_i = \frac{1}{n}$ . For reverse modeling, we use:

$$732 p_\phi(x_{t-1} | G_t) = \sum_{x_0} q(x_{t-1} | x_t, x_0) \cdot p_\phi(x_0 | G_t) \quad (15)$$

733 This formulation enables us to parameterize  $p_\phi(x_0 | G_t)$  with a neural network and compute  
734  $p_\phi(x_{t-1} | G_t)$  via marginalization over the clean state space using Eq. (3).

### 735 A.4 DERIVATION OF $q(x_{t-1} | x_t, x_0)$

736 We begin by defining the composite transition matrix over steps  $s$  through  $t$  as  $\overline{Q}_{t|s} =$   
737  $Q_s Q_{s+1} \cdots Q_t$ . For brevity, we denote  $\overline{Q}_t = \overline{Q}_{t|0}$  and  $\overline{Q}_{t-1} = \overline{Q}_{t-1|0}$ . Our goal is to compute  
738 the posterior distribution  $q(x_{t-1} | x_t, x_0)$ , assuming the forward process has the Markov structure  
739 given by:

$$740 q(x_t | x_{t-1}) = \text{Cat}(x_t; Q_t^\top x_{t-1}) \quad (16)$$

From the chain rule of probability:

$$q(x_{t-1} | x_t, x_0) = \frac{q(x_t | x_{t-1})q(x_{t-1} | x_0)}{q(x_t | x_0)} \quad (17)$$

We expand each term using the forward marginals:

$$q(x_{t-1} | x_0) = \text{Cat}(x_{t-1}; \overline{Q}_{t-1}^\top x_0) \quad (18)$$

$$q(x_t | x_0) = \text{Cat}(x_t; \overline{Q}_t^\top x_0) \quad (19)$$

Thus, the numerator becomes:

$$q(x_t | x_{t-1})q(x_{t-1} | x_0) = (x_t^\top Q_t^\top x_{t-1}) \cdot (x_{t-1}^\top \overline{Q}_{t-1}^\top x_0)$$

We now marginalize over all possible  $x_{t-1}$  to normalize:

$$q(x_{t-1} | x_t, x_0) = \frac{Q_t x_t \odot \overline{Q}_{t-1}^\top x_0}{x_t^\top \overline{Q}_t^\top x_0}$$

Hence, the posterior is a categorical distribution over  $x_{t-1}$ :

$$q(x_{t-1} | x_t, x_0) = \text{Cat}\left(x_{t-1}; \frac{Q_t x_t \odot \overline{Q}_{t-1}^\top x_0}{x_t^\top \overline{Q}_t^\top x_0}\right) \quad (20)$$

## A.5 PROOF OF PERMUTATION INVARIANCE IN BLOCKWISE GRAPH GENERATION

To establish that  $p_\theta(G)$  is an exchangeable probability distribution over graphs, we aim to prove that for any permutation matrix  $P$ , the model satisfies

$$p_\theta(P \star G) = p_\theta(G), \quad (21)$$

where  $P \star G$  denotes the graph obtained by permuting both node indices and corresponding edge entries in  $G$ .

Our generative model factorizes the likelihood of a graph  $G$  based on block-wise decomposition induced by a structural ranking function  $\psi$ . Let  $\mathcal{B}_1, \dots, \mathcal{B}_{K_B}$  be the node subsets (blocks) ranked by  $\psi$ . The generation is performed sequentially over these blocks:

$$p_\theta(G) = \prod_{i=1}^{K_B} p_\theta(G[\mathcal{B}_i] | G[\mathcal{B}_{1:i-1}], G[\mathcal{B}_{1:i-1}] \setminus G[\mathcal{B}_i]). \quad (22)$$

**Permutation Equivariance of the Indexing.** Each block  $\mathcal{B}_i$  is determined from  $G$  using  $\psi(G)$ , which is permutation-consistent (Theorem 1). Thus, for any permutation matrix  $P$ , we have

$$\mathcal{B}_i(P \star G) = P \star \mathcal{B}_i(G). \quad (23)$$

Furthermore, indexing operations on graphs are equivariant:

$$P \star G[\mathcal{B}_i] = G[P \star \mathcal{B}_i]. \quad (24)$$

**Exchangeability of Block Generation.** Consider:

$$p_\theta(P \star G) = \prod_{t=1}^{K_B} p_\theta(P \star G[\mathcal{B}_t] | P \star G[\mathcal{B}_{1:t-1}], P \star (G[\mathcal{B}_{1:t-1}] \setminus G[\mathcal{B}_t])) \quad (25)$$

Since our model is constructed to be equivariant with respect to permutations, each conditional satisfies:

$$p_\theta(P \star X | P \star Y) = p_\theta(X | Y), \quad (26)$$

for arbitrary subgraphs  $X, Y$ . Applying this recursively yields:

$$p_\theta(P \star G) = \prod_{i=1}^{K_B} p_\theta(G[\mathcal{B}_i] | G[\mathcal{B}_{1:i-1}], G[\mathcal{B}_{1:i-1}] \setminus G[\mathcal{B}_i]) = p_\theta(G). \quad (27)$$

810 **Marginalization of Conditioning Sets.** For further rigor, define the conditional term

$$811 \quad p_\theta(G[\mathcal{B}_i] \mid G[\mathcal{B}_{1:i-1}] \setminus G[\mathcal{B}_i], G[\mathcal{B}_{1:i-1}]). \quad (28)$$

812 Let  $\mathcal{H}_{\mathcal{B}_{1:i-1}}$  denote all other nodes outside  $\mathcal{B}_{1:i}$ . Then,

$$813 \quad p_\theta(G[\mathcal{B}_i] \mid G[\mathcal{B}_{1:i-1}], G[\mathcal{B}_{1:i-1}] \setminus G[\mathcal{B}_i]) \\ 814 \quad = \int p_\theta(G[\mathcal{B}_i] \mid G[\mathcal{B}_{1:i-1}], \mathcal{H}_{\mathcal{B}_{1:i-1}}) \cdot p(\mathcal{H}_{\mathcal{B}_{1:i-1}}) d\mathcal{H}_{\mathcal{B}_{1:i-1}}. \quad (29)$$

815 Using the fact that the generative model’s forward noise and reverse denoising chains are designed  
816 to be permutation equivariant, we have:

$$817 \quad p_\theta(G) = \int p(H_T \mid G) \prod_{t=1}^T p(H_{t-1} \mid H_t) dH_{1:T}. \quad (30)$$

818 Then for any  $P$ :

$$819 \quad p_\theta(P \star G) = \int p(H_T \mid P \star G) \prod_{t=1}^T p(H_{t-1} \mid H_t) dH_{1:T}, \quad (31)$$

$$820 \quad = \int p(P \star H_T \mid G) \prod_{t=1}^T p(P \star H_{t-1} \mid P \star H_t) dH_{1:T}, \quad (32)$$

$$821 \quad = \int p(H_T \mid G) \prod_{t=1}^T p(H_{t-1} \mid H_t) dH_{1:T} = p_\theta(G). \quad (33)$$

822 This confirms that  $p_\theta(G)$  is invariant under any node permutation  $P$ , establishing exchangeability.

## 823 A.6 UNIFIED TRAINING AND GENERATION FOR BLOCK-WISE STRUCTURED GRAPH 824 DIFFUSION

---

### 825 **Algorithm 5** Unified Training and Generation Procedure for Block-wise Structured Graph Diffusion

---

826 **Require:** Graph  $G$ , max diffusion steps  $T$ , max hop  $K_h$ , block size predictor  $g_\theta$ , denoising model  $\ell_\alpha$

827 1: Obtain node ordering  $\psi$  from ordering network  $\phi$  (Algorithm 1)

828 2: Partition  $G$  into ranked blocks  $[\mathcal{C}_1, \dots, \mathcal{C}_{K_B}]$  using  $\psi$

829 3: **for**  $i = 1$  to  $K_B$  **do**

830 4:  $\tilde{\mathcal{C}}_i \leftarrow g_\theta(G_{\leq i-1})$

831 5:  $\mathcal{M} \leftarrow \text{mask}(G[\mathcal{C}_{1:i}] \setminus G[\mathcal{C}_{1:i-1}])$

832 6: Sample  $t \sim \mathcal{U}(1, T)$

833 7:  $\tilde{G}[\mathcal{C}_i] \leftarrow \mathcal{M} \odot q_t(G[\mathcal{C}_i]) + (1 - \mathcal{M}) \odot G[\mathcal{C}_i]$

834 8:  $X \leftarrow f_\theta(\tilde{G}[\mathcal{C}_i])$

835 9: Compute  $\ell_i^{\text{KL}}$  and  $\ell_i^{\text{CE}}$  using Eq. (2), Eq. (3)

836 10: **end for**

837 11: Minimize total loss:  $\sum_{i=1}^{K_B} \ell_i$

838 12:  $G \leftarrow \emptyset, i \leftarrow 1$

839 13: Sample  $n \sim g_\theta(G)$

840 14: **while**  $n > 0$  **do**

841 15: Add block  $\mathcal{C}_i$  with  $n$  nodes to  $G$

842 16:  $\mathcal{M} \leftarrow \text{mask}(G[\mathcal{C}_i] \setminus G[\mathcal{C}_{1:i-1}])$

843 17:  $\tilde{G} \leftarrow \text{Noise}(\mathcal{M})$

844 18: **for**  $j = 1$  to  $T$  **do**

845 19:  $\mathbf{p} \leftarrow f_\theta(\tilde{G})$

846 20: Sample  $S$  from  $\mathbf{p}$

847 21:  $\tilde{G} \leftarrow \mathcal{M} \odot S + (1 - \mathcal{M}) \odot \tilde{G}$

848 22: **end for**

849 23:  $G \leftarrow \tilde{G}$

850 24: Sample  $n \sim g_\theta(G)$

851 25:  $i \leftarrow i + 1$

852 26: **end while**

853 27: **return**  $G$

---

### 864 A.7 PROOF OF THEOREM 1

865 Consider a sequence of transition matrices  $\{\mathcal{T}_1, \dots, \mathcal{T}_T\}$ , each representing a categorical diffusion  
 866 step. The matrices should be constructed such that, at long time horizons ( $t \rightarrow T$ ), the resulting dis-  
 867 tribution converges to a known steady-state distribution  $\boldsymbol{\mu} \in D^K$ , where  $D^K$  is the  $K$ -dimensional  
 868 probability simplex. We define this limiting behavior as:  
 869

$$870 \lim_{t \rightarrow T} \mathcal{T}_t = \mathbf{1}\boldsymbol{\mu}^\top \quad (34)$$

871 This ensures that every row of the composed matrix approaches  $\boldsymbol{\mu}$ , making the distribution station-  
 872 ary. To enforce this convergence in a controllable way, we propose defining each transition matrix  
 873  $\mathcal{T}_t$  as a convex blend between the identity matrix and the rank-1 matrix  $\mathbf{1}\boldsymbol{\mu}^\top$ :

$$874 \mathcal{T}_t = \gamma_t \cdot \mathbf{I} + (1 - \gamma_t) \cdot \mathbf{1}\boldsymbol{\mu}^\top, \quad \gamma_t \in [0, 1] \quad (35)$$

875 The accumulated transition from time step  $s$  to  $t$ , denoted as  $\mathcal{T}_{t|s}$ , can be recursively written as  
 876 follows:

$$877 \mathcal{T}_{t|s} = \gamma_{t|s} \cdot \mathbf{I} + (1 - \gamma_{t|s}) \cdot \mathbf{1}\boldsymbol{\mu}^\top, \quad (36)$$

878 where the effective decay factor  $\gamma_{t|s}$  is the product of all decay terms from step  $s + 1$  to  $t$ :

$$879 \gamma_{t|s} = \prod_{r=s+1}^t \gamma_r \quad (37)$$

880 This implies:

$$881 \gamma_t = \gamma_{t|0} = \gamma_{t|s} \cdot \gamma_s \quad (38)$$

882 With this formulation, we ensure that as  $t \rightarrow T$ , the accumulated matrix  $\mathcal{T}_{t|0}$  becomes fully rank-1,  
 883 and the variable distribution becomes indistinguishable from the stationary prior  $\boldsymbol{\mu}$ . This gives the  
 884 reparameterized posterior for timestep  $t - 1$ , used in computing the variational loss. We present  
 885 the argument for node representations; the same reasoning holds for structurally symmetric edges.  
 886 Suppose that two nodes  $u$  and  $v$  in a graph  $G$  are structurally indistinguishable. Then, there exists a  
 887 graph automorphism  $\pi \in \text{Aut}(G)$  such that:

$$888 \pi(u) = v \quad (39)$$

889 Let  $\mathcal{P}_n$  denote the set of all node permutation matrices of size  $n \times n$ . Assume we have a neural  
 890 function  $\psi : G \mapsto \mathbb{R}^{n \times d}$  that is permutation-equivariant, i.e., for any permutation matrix  $\pi \in \mathcal{C}_n$ ,  
 891 we have:

$$892 \psi(\pi \star G) = \pi \star \psi(G) \quad (40)$$

893 Now, apply  $\pi$  as the permutation on nodes. Because  $\pi$  is an automorphism of  $G$ , it preserves the  
 894 graph structure, so  $\pi \star G = G$ . Thus:

$$895 \psi(G) = \psi(\pi \star G) = \pi \star \psi(G) \quad (41)$$

896 This implies:

$$897 \psi(G)_u = \psi(G)_v \quad (42)$$

898 In other words, nodes  $u$  and  $v$ , being symmetric under graph automorphism  $\pi$ , are mapped to iden-  
 899 tical representations by the function  $\psi$ .

### 900 A.8 PROOF OF THEOREM 2

901 Let  $\sigma \in \text{Auto}(G)$ . By definition,  $\sigma \star G = G$  (the attributed graph is unchanged by  $\sigma$ ). By permutation  
 902 equivariance of  $\Phi$ ,

$$903 \Phi(G) = \Phi(\sigma \star G) = \sigma \star \Phi(G). \quad (43)$$

918 Unpacking the rightmost equality component-wise over nodes gives, for every  $w \in \mathcal{V}$ ,

$$919 \quad \Phi(G)_w = (\sigma \star \phi(G))_w = \phi(G)_{\sigma^{-1}(w)}. \quad (44)$$

920 Equivalently, for every  $w$ ,  $\Phi(G)_{\sigma(w)} = \Phi(G)_w$ . Now fix any two nodes  $u, v \in \mathcal{V}$  in the same  
 921  $\text{Aut}(G)$ -orbit. By definition, there exists  $\sigma \in \text{Aut}(G)$  with  $\sigma(u) = v$ . Applying the relation above  
 922 with  $w = u$  yields

$$923 \quad \Phi(G)_v = \phi(G)_{\sigma(u)} = \Phi(G)_u, \quad (45)$$

924 establishing  $\Phi(G)_u = \Phi(G)_v$ . The argument for edge embeddings is identical: let  $\Phi^{(e)}$  map  $G$   
 925 to edge-wise outputs indexed by ordered (or unordered) pairs. Equivariance acts on pairs via  $\pi \star$   
 926  $(i, j) = (\pi(i), \pi(j))$ . For any automorphism  $\sigma$ ,  $\Phi^{(e)}(G) = \sigma \star \Phi^{(e)}(G)$ , hence  $\Phi^{(e)}(G)_{(i,j)} =$   
 927  $\Phi^{(e)}(G)_{(\sigma(i), \sigma(j))}$ . If  $(u, v)$  and  $(u', v')$  are in the same orbit, choose  $\sigma$  with  $\sigma(u) = u'$ ,  $\sigma(v) = v'$   
 928 to conclude equality of their edge embeddings. Since the derivation uses only (1)  $\sigma \star G = G$  for  
 929  $\sigma \in \text{Aut}(G)$  and (2) equivariance of  $\Phi$ , the result is independent of depth/width/expressivity.

930 **Implication.** (1) On features. The statement assumes automorphisms preserve all attributes used by  
 931  $\Phi$ . If node/edge features break symmetry (e.g., unique IDs), then  $\text{Aut}(G)$  shrinks accordingly; the  
 932 conclusion applies with respect to that reduced group. (2) Symmetry cannot be broken internally.  
 933 The proof formalizes the impossibility of distinguishing nodes within an automorphism orbit by  
 934 any permutation-equivariant architecture alone. To separate orbit-mates, one must inject symmetry-  
 935 breaking signals (positional encodings, random IDs, anchors, or global tie-breakers); and (3) Group-  
 936 theoretic view. The equality  $\Phi(G) = \sigma \star \phi(G) \forall \sigma \in \text{Aut}(G)$  means  $\Phi(G)$  lies in the fixed-point  
 937 subspace of the representation of  $\text{Aut}(G)$ . Constancy on orbits is exactly the characterization of  
 938 such fixed points by Burnside’s lemma/orbit–stabilizer intuition.

### 939 A.9 PROOF OF THEOREM 3

940 To demonstrate that the learned probability distribution  $\mathbb{P}_\phi(G)$  over graphs is exchangeable, we  
 941 must verify that for any node permutation matrix  $\pi \in \mathcal{C}_n$ , the group of node permutations, it holds  
 942 that:

$$943 \quad \mathbb{P}_\phi(\pi \star G) = \mathbb{P}_\phi(G) \quad (46)$$

944 Here,  $\pi \star G$  denotes the permuted graph, where nodes and their relations (or, edges) are permuted  
 945 accordingly:  $\pi \star G = (\pi \cdot V, \pi \cdot E \cdot \pi^\top)$ . Assume that the generation model produces a graph via a  
 946 sequential composition of subgraphs defined by structural neighborhoods or partitions, such that:

$$947 \quad \mathbb{P}_\phi(G) = \prod_{i=1}^K \mathbb{P}_\phi(G_{\leq i} \setminus G_{\leq i-1} \mid G_{\leq i-1}) \quad (47)$$

948 Here,  $G_{\leq i}$  denotes the union of the first  $i$  block  $\mathcal{C}_1 \cdots \mathcal{C}_i$  (e.g., neighborhoods) induced by a binary  
 949 mask over nodes. This indexing operation is permutation-equivariant:

$$950 \quad \pi \star (G_{\leq i}) = (\pi \star G)_{\leq i} \quad (48)$$

951 Additionally, suppose that each subset  $(\pi \star G)_{\leq i}$  is selected via a deterministic function of the graph  
 952 structure (e.g., via neighborhood expansion or hop-based grouping), which is also equivariant under  
 953 permutation. Then:

$$954 \quad (\pi \star G)_{\leq i} = \pi \star G_{\leq i} \quad (49)$$

Now evaluate the generative model on the permuted graph:

$$\begin{aligned}
\mathbb{P}_\phi(\pi \star G) &= \prod_{i=1}^K \mathbb{P}_\phi((\pi \star G)_{\leq i} \setminus (\pi \star G)_{\leq i-1} \mid (\pi \star G)_{\leq i-1}) \\
&= \prod_{i=1}^K \mathbb{P}_\phi(\pi \star (G_{\leq i} \setminus G_{\leq i-1}) \mid \pi \star G_{\leq i-1}) \\
&= \prod_{i=1}^K \mathbb{P}_\phi(\pi \star \Delta_i \mid \pi \cdot \mathcal{G}_{< i}),
\end{aligned} \tag{50}$$

where  $\Delta_i = G_{\leq i} \setminus G_{\leq i-1}$ , and  $G_{< i} = \mathcal{C}_1 \cup \dots \cup \mathcal{C}_{i-1}$ . If the conditional probabilities  $\mathbb{P}_\phi$  are defined through permutation-invariant functions (e.g., based on multi-set or degree statistics), then we have:

$$\mathbb{P}_\phi(\pi \star \Delta_i \mid \pi \star G_{\leq i}) = \mathbb{P}_\phi(\Delta_i \mid G_{\leq i}) \tag{51}$$

Thus,

$$\mathbb{P}_\phi(\pi \star G) = \mathbb{P}_\phi(G), \tag{52}$$

which confirms the probability distribution modeled by  $\mathbb{P}_\phi$  is invariant under node permutations, i.e., it is exchangeable.

#### A.10 DERIVING A BLOCK-CAUSAL MATRIX PRODUCT

Let  $X \in \mathbb{R}^{n \times d}$  and  $Y \in \mathbb{R}^{d \times m}$  be two matrices. Define the standard matrix multiplication entry as:

$$[XY]_{ij} = \langle \mathbf{x}_i, \mathbf{y}_j \rangle, \tag{53}$$

where  $\mathbf{x}_i$  denotes the  $i$ -th row of  $X$ , and  $\mathbf{y}_j$  is the  $j$ -th column of  $Y$ . Now, in a block-wise AR setting, we introduce a function  $b : \{1 \dots n\} \mapsto \mathbb{N}$  assigning a block index to each row/column. The matrix entry  $(i, j)$  should depend only on features from block indices  $\leq \max(b(i), b(j))$ . To ensure this, define a binary mask matrix  $\mathcal{M} \in \{0, 1\}^{n \times d}$ , where:

$$\mathcal{M}_{ik} = \begin{cases} 1 & \text{if } b(i) \geq b(k) \\ 0 & \text{otherwise} \end{cases} \tag{54}$$

For a safe computation of the entry  $\mathcal{Z}_{ij}$  under this constraint, we define:

$$\mathcal{Z}_{ij} = \langle \mathbf{x}_i \odot (\boldsymbol{\mu}_i \vee \boldsymbol{\mu}_j), \mathbf{y}_j \rangle \tag{55}$$

Here,  $\boldsymbol{\mu}_i$  and  $\boldsymbol{\mu}_j$  are binary indicator vectors selecting valid components, and  $\odot$  denotes the Hadamard (element-wise) product, while  $\vee$  is the element-wise logical OR. We can expand this expression as:

$$\mathcal{Z}_{ij} = \langle \mathbf{x}_i \odot \boldsymbol{\mu}_i, \mathbf{y}_j \rangle + \langle \mathbf{x}_i, \mathbf{y}_j \odot \boldsymbol{\mu}_j \rangle - \langle \mathbf{x}_i \odot \boldsymbol{\mu}_i, \mathbf{y}_j \odot \boldsymbol{\mu}_j \rangle \tag{56}$$

In matrix form, letting  $\mathbf{Z}$  be the final output:

$$\mathbf{Z} = (\mathbf{X} \odot \mathcal{M})\mathbf{Y} + \mathbf{X}(\mathbf{Y} \odot \mathcal{M}^\top) - (\mathbf{X} \odot \mathcal{M})(\mathbf{Y} \odot \mathcal{M}^\top) \tag{57}$$

This formulation ensures that information flows only within valid block boundaries, enabling parallelizable yet causally consistent matrix computation.

#### A.11 STRUCTURED GRID GRAPHS

This section presents a few more structured artificial grid generated using the proposed PARDIFF algorithm:

1026  
1027  
1028  
1029  
1030  
1031  
1032  
1033  
1034  
1035  
1036  
1037  
1038  
1039  
1040  
1041  
1042  
1043  
1044  
1045  
1046  
1047  
1048

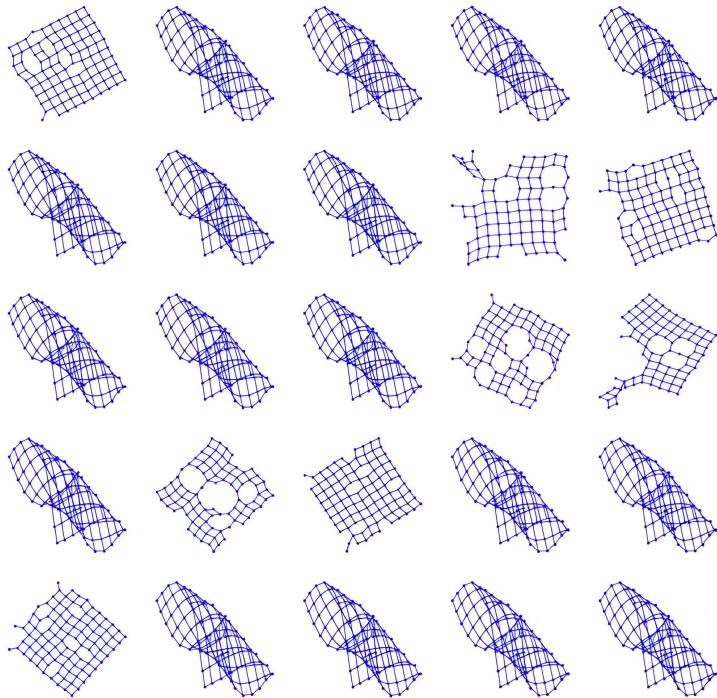

1049  
1050  
1051  
1052

Figure 2: Non-curated structured grid graphs generated by our method, trained with 50 diffusion steps per block. The samples display mostly regular grid-like topology with occasional geometric perturbations, demonstrating the model’s ability to capture both structure and variation without any filtering.

1053  
1054  
1055

#### A.11.1 AUTOREGRESSION IN DIFFUSION MODELS: ESSENTIAL OR EXCESS?

1056  
1057  
1058  
1059  
1060  
1061  
1062  
1063  
1064  
1065  
1066  
1067  
1068  
1069  
1070

Although denoising diffusion models are naturally permutation-invariant, we examine whether incorporating an AR structure offers tangible benefits. Specifically, we investigate whether decomposing the graph generation process into block-wise conditional distributions—based on a structural partial order—can lead to improved quality, efficiency, and stability. To this end, we perform an ablation study by varying the hop radius  $K_h$ , which defines the granularity of autoregressive blocks. When  $K_h = 0$ , the graph is treated as a single undivided structure—this corresponds to pure diffusion without any AR decomposition. Larger values of  $K_h$  yield finer block-wise partitions, introducing more AR steps. We also evaluate a variant where diffusion is performed without AR but with a larger number of denoising steps, to control for potential improvements from increased sampling. Across all settings, we report molecule validity, uniqueness, atomic and molecular stability, and the FCD. The results, summarized in Table 5, indicate that autoregressive diffusion significantly enhances generation quality. Notably, PARDiff with  $K_h = 3$  achieves the best performance with fewer total diffusion steps compared to non-AR setups. This confirms that AR decomposition provides stronger inductive bias, improved stability, and more efficient training—even in permutation-invariant settings.

1071  
1072  
1073

Table 5: Ablation on QM9 under different autoregressive granularities  $K_h$ . More blocks (higher  $K_h$ ) improve performance.

1074  
1075  
1076  
1077  
1078  
1079

| $K_h$ | Steps | Blks | Size | Val.        | Uni.        | Mol-Stab    | Atm-Stab    | FCD         |
|-------|-------|------|------|-------------|-------------|-------------|-------------|-------------|
| 0     | 140   | 1    | 23.4 | 93.1        | 95.7        | 76.2        | 97.5        | 2.15        |
| 0     | 280   | 1    | 23.4 | 94.0        | 96.2        | 78.1        | 97.8        | 1.84        |
| 0     | 490   | 1    | 23.4 | 94.8        | 96.6        | 78.3        | 98.0        | 1.69        |
| 1     | 140   | 4.1  | 5.7  | 97.3        | 96.7        | 86.8        | 98.4        | 1.21        |
| 2     | 140   | 6.2  | 3.8  | 97.5        | 96.5        | 87.0        | 98.6        | 1.13        |
| 3     | 140   | 8.0  | 3.1  | <b>97.8</b> | <b>96.9</b> | <b>88.2</b> | <b>98.9</b> | <b>0.96</b> |



1080  
1081  
1082  
1083  
1084  
1085  
1086  
1087  
1088  
1089  
1090  
1091  
1092  
1093  
1094  
1095  
1096  
1097  
1098  
1099  
1100  
1101  
1102

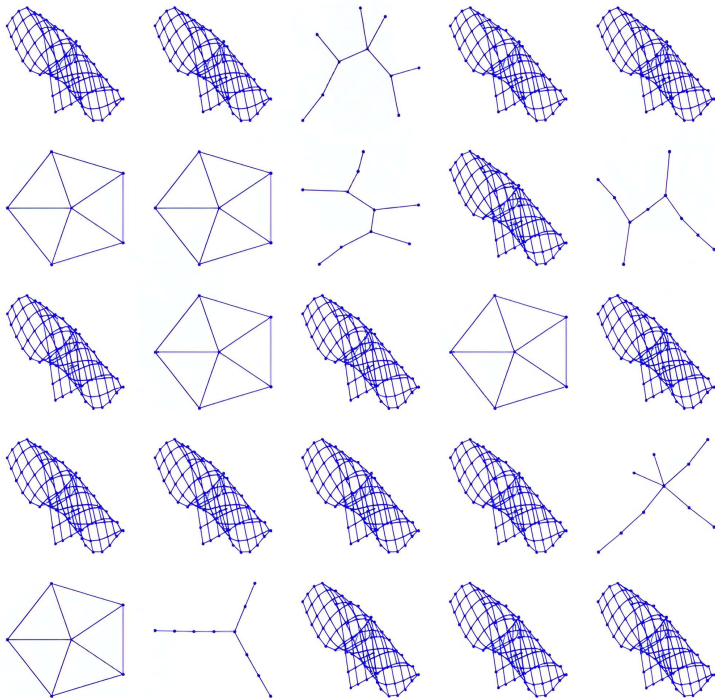

Figure 3: Unfiltered grid-like graphs generated by the eigenvector-enhanced model trained with 50 steps per block.

1103  
1104  
1105  
1106  
1107  
1108  
1109  
1110  
1111  
1112  
1113  
1114  
1115  
1116  
1117

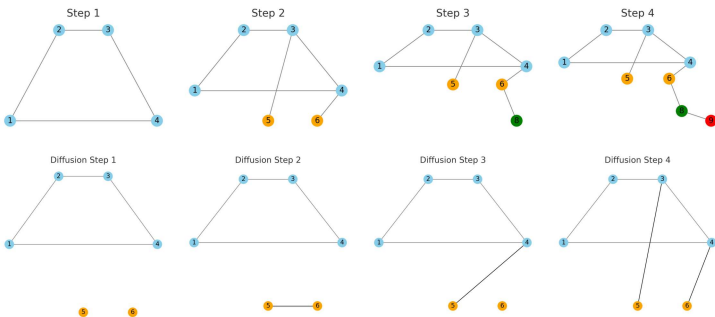

Figure 4: Comparison of autoregressive and diffusion-based graph generation. The top row illustrates autoregressive generation, where nodes and edges are sequentially added in each step. The bottom row shows diffusion-based generation, where the graph is iteratively refined from a noisy initialization toward the target structure.

1122  
1123

### A.12 ABLATION STUDY

1124  
1125  
1126  
1127  
1128  
1129  
1130  
1131  
1132  
1133

Table 5 investigates the effect of varying autoregressive granularity, controlled by the number of hierarchical blocks  $K_h$ , on generation quality in the QM9 dataset. When  $K_h = 0$ , the model generates the entire graph in a single step, yielding lower performance across all metrics. Increasing the number of diffusion steps improves results incrementally (e.g., FCD drops from 2.15 to 1.69 as steps increase from 140 to 490), but this comes at the cost of significantly higher computational burden, with no structural decomposition. In contrast, introducing even a moderate level of autoregressive structure ( $K_h = 1$ ) immediately boosts performance across all axes—validity, stability, and FCD—indicating that decomposing the graph into substructures introduces useful inductive bias that guides generation more effectively.

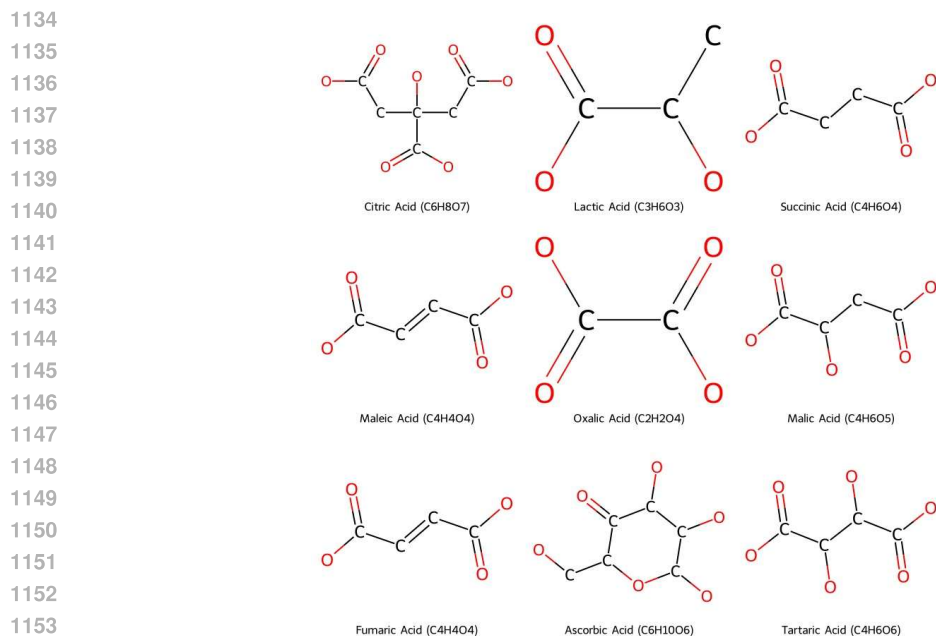

1155 Figure 5: Sample complex molecular structures are generated using PARDIFF.

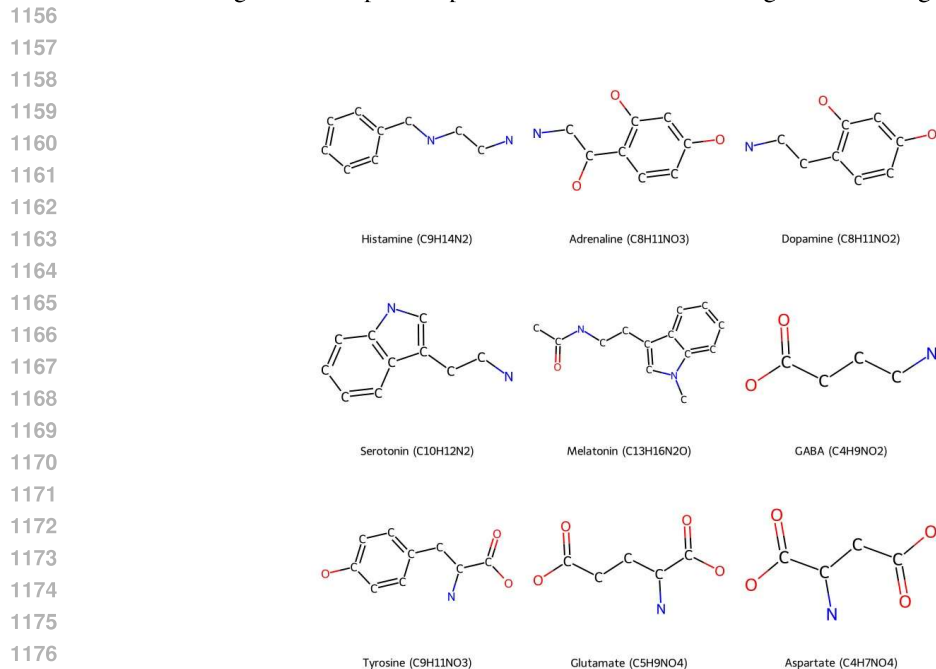

1178 Figure 6: Sample complex molecular structures are generated using PARDIFF.

1181 As  $K_h$  increases further, the model progressively refines its granularity of generation, leading to  
1182 more stable and chemically plausible molecules. At  $K_h = 3$ , where the graph is generated in 8  
1183 blocks, the model achieves its best overall results: highest molecular validity (97.8%), atom stabil-  
1184 ity (98.9%), and the lowest Fréchet ChemNet Distance (0.96). This trend demonstrates that finer-  
1185 grained autoregressive modeling enables the diffusion process to better condition on intermediate  
1186 structural context, capturing both local and global dependencies. Figures 8 through 13 show repre-  
1187 sentative samples produced by our model, covering a wide range of organic molecules, including  
acids, amines, aromatics, and biologically relevant compounds. By progressively adding blocks

1188

1189

1190

1191

1192

1193

1194

1195

1196

1197

1198

1199

1200

1201

1202

1203

1204

1205

1206

1207

1208

1209

1210

1211

1212

1213

1214

1215

1216

1217

1218

1219

1220

1221

1222

1223

1224

1225

1226

1227

1228

1229

1230

1231

1232

1233

1234

1235

1236

1237

1238

1239

1240

1241

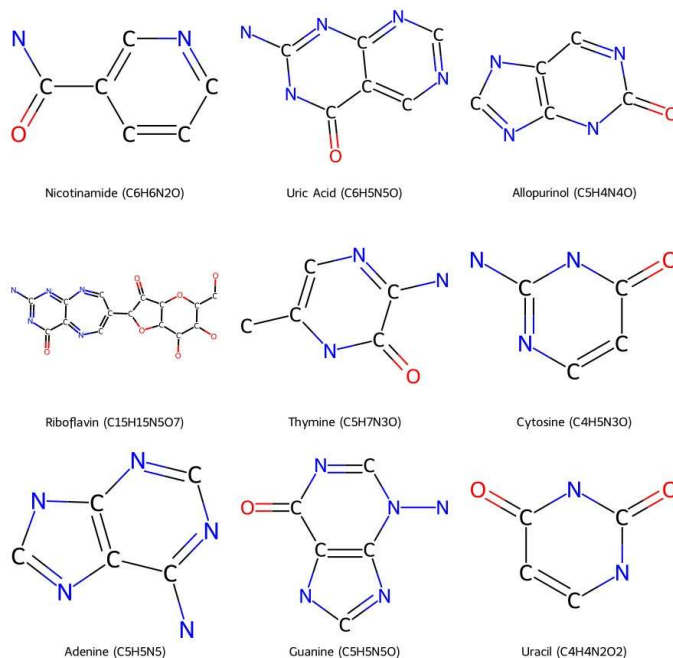

Figure 7: Sample complex molecular structures are generated using PARDIFF.

1212

1213

1214

1215

1216

1217

1218

1219

1220

1221

1222

1223

1224

1225

1226

1227

1228

1229

1230

1231

1232

1233

1234

1235

1236

1237

1238

1239

1240

1241

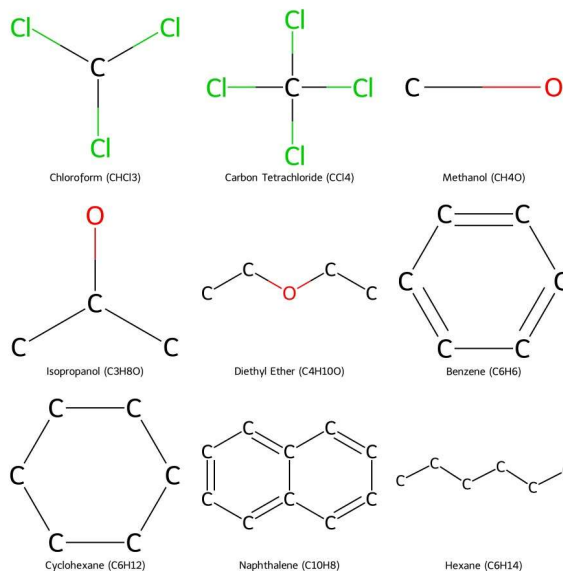

Figure 8: Sample complex molecular structures are generated using PARDIFF.

of symmetrically ranked nodes and leveraging a permutation-invariant diffusion process, PARDIFF preserves both structural diversity and chemical consistency during generation, capturing intricate bonding patterns with high fidelity.

**Corollary 1. Expressivity Bound via WL Test:** *Since permutation-equivariant neural networks cannot distinguish nodes within the same automorphism orbit of  $G$ , their discriminative power is upper-bounded by the coarsest refinement of these orbits achievable through neighborhood aggregation. In particular, the expressive capacity of message-passing GNNs aligns with the 1-dimensional Weisfeiler–Lehman (1-WL) test:  $u \sim_{\text{WL}} v \implies \Phi(u) = \Phi(v)$ .*

1242  
1243  
1244  
1245  
1246  
1247  
1248  
1249  
1250  
1251  
1252  
1253  
1254  
1255  
1256  
1257  
1258  
1259  
1260  
1261  
1262  
1263  
1264

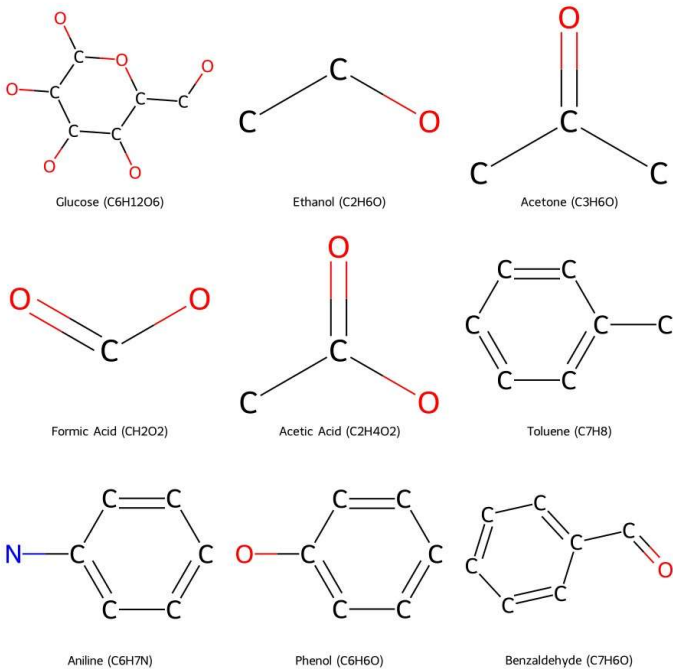

Figure 9: Sample complex molecular structures are generated using PARDIFF.

1265  
1266  
1267  
1268  
1269  
1270  
1271  
1272  
1273  
1274  
1275  
1276  
1277  
1278

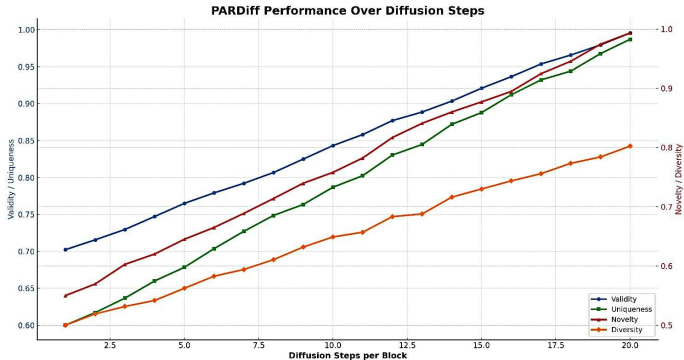

Figure 10: Non-curated structured grid graphs generated by PARDIFF, trained with 50 diffusion steps per block. The samples display mostly regular grid-like topology with occasional geometric perturbations, demonstrating the model’s ability to capture both structure and variation without any filtering.

1283  
1284  
1285  
1286  
1287  
1288  
1289  
1290  
1291  
1292  
1293  
1294  
1295

*Proof.* We prove the 1-WL implication by induction over layers and then conclude the orbit claim. Let  $w \in \mathcal{V}$  is the raw input features of one specific node of the graph  $G = (V, E)$ .  $\mathbf{x}_w \in \mathbb{R}^d$  is the input feature vector of node  $w$ . For example, in a molecular graph,  $\mathbf{x}_w$  might encode atom type, charge, etc. Let the MPNN have  $L$  layers with following updates:

$$\mathbf{h}_w^{(0)} = \psi(\mathbf{x}_w); \mathbf{h}_w^{(l+1)} = U(\mathbf{h}_w^{(l)}, A(\mathbf{h}_t^{(l)} : t \in \mathcal{N}(w))), \tag{58}$$

where  $A$  is a permutation-invariant multiset aggregator and  $U$  a shared update;  $\Phi(w) = \mathbf{h}_w^{(L)}$ . Let  $c_w^{(k)}$  denote the 1-WL color of node  $w$  after  $k$  rounds:

$$c_w^{(0)} = \text{Hash}(\mathbf{x}_w); c_w^{(k+1)} = \text{Hash}(c_w^{(k)}, c_t^{(k)} : t \in \mathcal{N}(w)). \tag{59}$$

Induction hypothesis. Suppose for some  $k \leq L$ ;  $c_u^{(k)} = c_v^{(k)} \implies \mathbf{h}_u^{(k)} = \mathbf{h}_v^{(k)}$ .

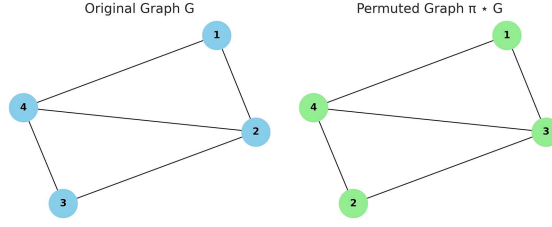

Figure 11: Illustration of permutation-consistency (equivariance, in Theorem 2) in node ranking using a 4 node graph. *Left*: The original graph  $G$ , where each node is annotated with its ranking value  $\psi(u)$ . *Right*: The permuted graph  $\pi \star G$ , obtained by swapping nodes 2 and 3. The ranking values move consistently with the node labels, showing that  $\psi(\pi \star G) = \pi \star \psi(G)$ . The structure and relative ordering are preserved under relabeling, demonstrating the permutation-invariance property of Algorithm 1.

1. Base ( $k = 0$ ). If  $c_u^{(0)} = c_v^{(0)}$ , then  $\mathbf{x}_u$  and  $\mathbf{x}_v$  are in the same attribute class; since  $\psi$  is shared,  $\mathbf{h}_u^{(0)} = \psi(\mathbf{x}_u) = \psi(\mathbf{x}_v) = \mathbf{h}_v^{(0)}$ .
2. Step ( $k \rightarrow k + 1$ ). Assume  $c_u^{(k+1)} = c_v^{(k+1)}$ . By 1-WL’s update, we must have both

$$c_u^{(k)} = c_v^{(k)}; \{c_t^{(k)} : t \in \mathcal{N}(u)\} = \{c_t^{(k)} : t \in \mathcal{N}(v)\} \quad (60)$$

By the induction hypothesis,  $c_u^{(k)} = c_v^{(k)}$  implies  $\mathbf{h}_u^{(k)} = \mathbf{h}_v^{(k)}$ . Moreover, the multiset equality of neighbor colors implies (again by the hypothesis applied elementwise) that the multisets of neighbor embeddings coincide:

$$\{\mathbf{h}_t^{(k)} : t \in \mathcal{N}(u)\} = \{\mathbf{h}_t^{(k)} : t \in \mathcal{N}(v)\}. \quad (61)$$

Applying the permutation-invariant aggregator  $A$  to equal multisets yields equal aggregated messages, and then the shared update  $U$  gives:

$$\begin{aligned} \mathbf{h}_u^{(k+1)} &= U(\mathbf{h}_u^{(k)}, A(\mathbf{h}_t^{(k)} : t \in \mathcal{N}(u))) \\ &= U(\mathbf{h}_v^{(k)}, A(\mathbf{h}_t^{(k)} : t \in \mathcal{N}(v))) = \mathbf{h}_v^{(k+1)}. \end{aligned} \quad (62)$$

Thus the claim holds for  $k + 1$ . By induction, for any  $L$ ,  $u \sim_{\text{WL}} v \implies \mathbf{h}_u^{(L)} = \mathbf{h}_v^{(L)}$ , i.e.,  $\Phi(u) = \Phi(v)$ .

Automorphism orbits. 1-WL is permutation-invariant; in particular, it assigns equal colors to nodes in the same automorphism orbit (an automorphism maps neighborhoods bijectively at every radius). Hence the 1-WL partition is a coarsening of the orbit partition, and the argument above shows MPNNs cannot refine beyond the WL partition. Therefore permutation-equivariant MPNNs cannot distinguish nodes within the same orbit, nor any pair that 1-WL fails to separate. This proves the corollary.  $\square$

Corollary 1 makes explicit that the theoretical ceiling for most GNN architectures is the WL color refinement procedure. (1) Automorphism orbits define the hard limit: nodes indistinguishable under symmetry will always collapse to identical embeddings. (2) The WL hierarchy shows the algorithmic limit: even when automorphisms are broken, message-passing can at best refine equivalence classes to the 1-WL partition; and (3) Consequently, higher-order GNNs (e.g.,  $K$ -WL-GNNs) or symmetry-breaking techniques (e.g., random features, positional encodings, anchor nodes) are required to exceed the expressivity of 1-WL. This bridges group theory (automorphisms), graph theory (orbit partitions), and deep learning (GNN expressivity), offering a unified lens on why standard GNNs fail on hard isomorphism cases such as strongly regular graphs or CAI–FÜRER–IMMERMAN (CFI) graphs Wang et al. (2023) (see Fig. 12).

1350  
1351  
1352  
1353  
1354  
1355  
1356  
1357  
1358  
1359  
1360  
1361  
1362  
1363  
1364  
1365  
1366  
1367  
1368  
1369  
1370  
1371  
1372  
1373  
1374  
1375  
1376  
1377  
1378  
1379  
1380  
1381  
1382  
1383  
1384  
1385  
1386  
1387  
1388  
1389  
1390  
1391  
1392  
1393  
1394  
1395  
1396  
1397  
1398  
1399  
1400  
1401  
1402  
1403

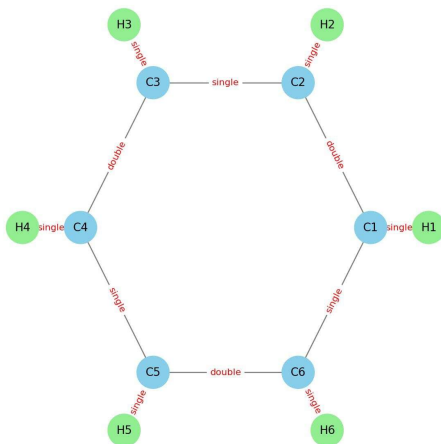

Figure 12: Illustration of orbit equivalence under graph automorphisms. Shown is a 6-cycle graph  $C_6H_6$  (Benzene ring), where nodes sharing the same color belong to the same orbit under the automorphism group  $\text{Aut}(G)$ . Any permutation-equivariant GNN assigns identical embeddings to nodes within the same orbit, regardless of its depth or capacity. This highlights the fundamental expressivity limitation: GNNs cannot distinguish structurally symmetric nodes without additional symmetry-breaking features or higher-order mechanisms (e.g.,  $K$ -WL refinements).
